# Supplementary material for: A hyaluronic acid–pentamidine bioconjugate as a macrophage mediated drug targeting delivery system for the treatment of leishmaniasis
Source: Royal Society of Chemistry journal article supplement (doi:10.1039/c5ra18019h), 2015-01-01

## Electronic Supplementary Information (ESI)

### Hyaluronic acid-pentamidine bioconjugate as macrophage mediated drug targeting delivery system for the treatment of Leishmaniasis

N. Micale,<sup>a\*</sup> A. Piperno,<sup>b</sup> N. Mahfoudh,<sup>c</sup> U. Schurigt,<sup>d</sup> M. Schultheis,<sup>d</sup> P.G. Mineo,<sup>e</sup> T. Schirmeister,<sup>f</sup> A. Scala,<sup>b</sup> G. Grassi<sup>b</sup>

<sup>a</sup> Department of Drug Sciences and health Products, University of Messina, Viale S.S. Annunziata, 98168 Messina, Italy. E-mail: nmicale@unime.it

<sup>b</sup> Department of Chemical Sciences, University of Messina, Viale F. Stagno D'Alcontres, 98166 Messina, Italy.

<sup>c</sup> Department of Medicinal and Organic Chemistry, University of Granada, Faculty of Pharmacy, 18071 Granada, Spain.

<sup>d</sup> Institute for Molecular Infection Biology, University of Würzburg, Josef-Schneider-Str. 2, Würzburg 97074, Germany.

<sup>e</sup> Department of Chemical Sciences, University of Catania, Viale A. Donia 6, 95125 Catania, Italy.

<sup>f</sup> Institute of Pharmacy and Biochemistry, University of Mainz, staudingerweg 5, D-55128 Mainz, Germany.

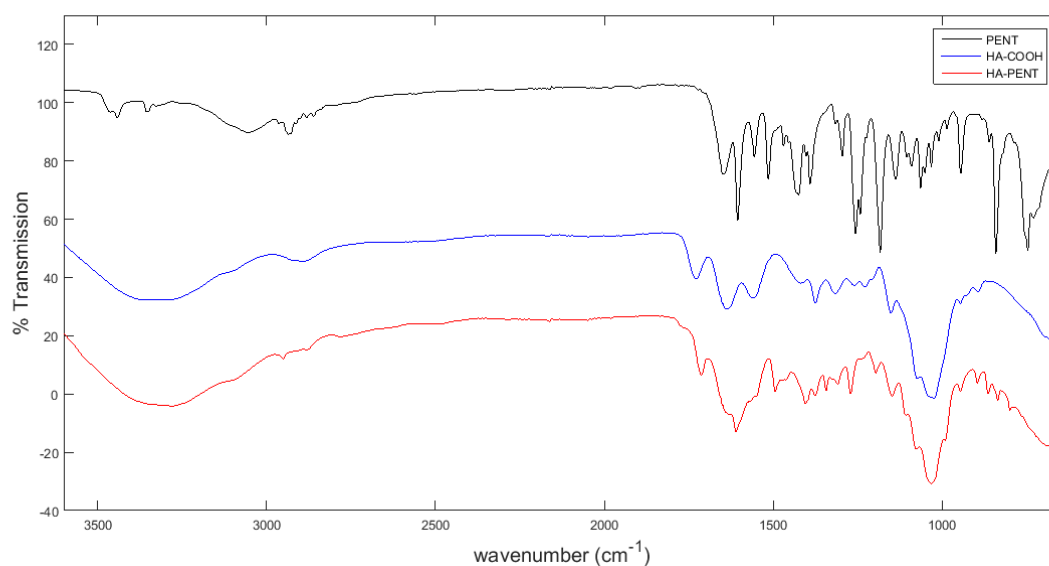

**Figure S1** . FT- IR Spectra of Pent, HA-COOH and HA-Pent

Figure S2 .  $^{13}\text{C}$  NMR of **HA-Pent3** in  $\text{D}_2\text{O}/\text{DMSO-d}_6$  ( 95/5)

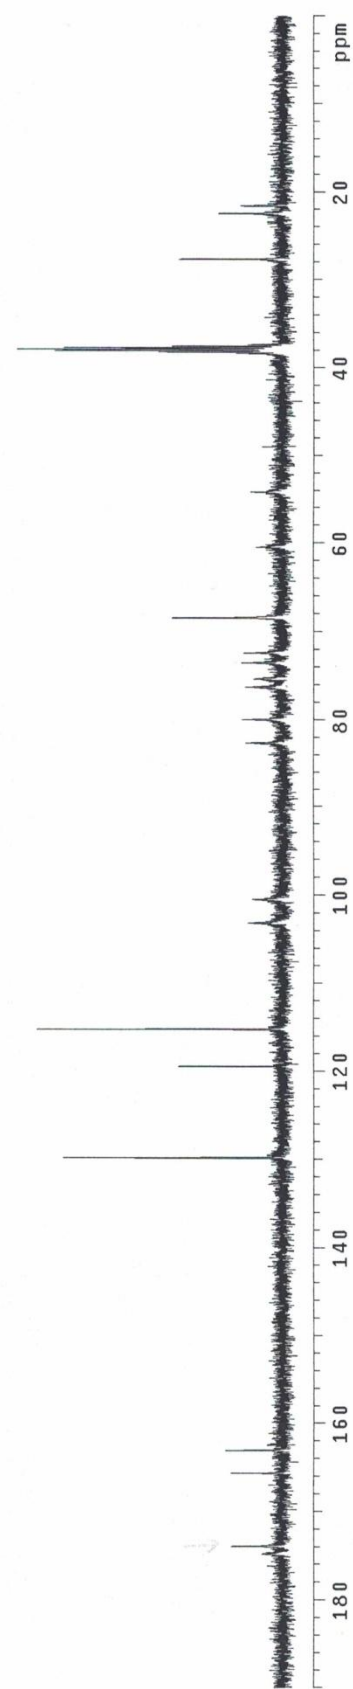

Supplement: c5ra18019h1.pdf [file c5ra18019h1.pdf]
